# Supplementary material for: Kinase network dysregulation in a human induced pluripotent stem cell model of DISC1 schizophrenia
Source: Royal Society of Chemistry journal article supplement (doi:10.1039/c8mo00173a), 2019-05-20
Supplement: c8mo00173a2.xlsx [file c8mo00173a2.xlsx]

## Sheet: Sheet1
INDEX	Group	Protein	Accession #	Annotation	SC	TP	Control-family (Ctl)		Schizophrenia (Sch)
							Sample 1	Sample 2	Sample 3	Sample 4	Sample 5	ttest, p	LOG2
							sig128	sig129	sig128b	sig129b	sig131
1982	1619.1	M4K5	sp|Q9Y4K4|M4K5_HUMAN	Mitogen-activated protein kinase kinase kinase kinase 5 OS=Homo sapiens GN=MAP4K5 PE=1 SV=1	48	14	0.807559	0.823546	1.04723	1.16726	1.14168	0.00778666	0.456003
3269	2819.2	DYR1B	sp|Q9Y463|DYR1B_HUMAN	Dual specificity tyrosine-phosphorylation-regulated kinase 1B OS=Homo sapiens GN=DYRK1B PE=1 SV=1	13	5	0.774257	0.707085	0.933673	1.15702	1.04475	0.039397	0.4968
520	364.1	MK01	sp|P28482|MK01_HUMAN	Mitogen-activated protein kinase 1 OS=Homo sapiens GN=MAPK1 PE=1 SV=3	154	10	0.899138	0.79859	1.00938	1.03415	0.947811	0.0593667	0.232223
3792	3313.2	MAPK3	sp|Q16644|MAPK3_HUMAN	MAP kinase-activated protein kinase 3 OS=Homo sapiens GN=MAPKAPK3 PE=1 SV=1	20	6	1.24048	1.43081	0.76965	0.993193	0.840105	0.0242963	-0.622349
521	364.2	MK06	sp|Q16659|MK06_HUMAN	Mitogen-activated protein kinase 6 OS=Homo sapiens GN=MAPK6 PE=1 SV=1	24	6	0.682678	0.67381	1.1734	1.13654	0.969352	0.0144664	0.688545
656	472.1	WNK2	sp|Q9Y3S1|WNK2_HUMAN	Serine/threonine-protein kinase WNK2 OS=Homo sapiens GN=WNK2 PE=1 SV=4	129	33	1.33206	1.35594	0.933673	0.952237	0.958582	8.01105e-05	-0.503322
1345	1057.1	TAOK1	sp|Q7L7X3|TAOK1_HUMAN	Serine/threonine-protein kinase TAO1 OS=Homo sapiens GN=TAOK1 PE=1 SV=1	71	15	0.757607	0.723722	1.08508	1.1263	1.06629	0.000885735	0.560815
1346	1057.2	TAOK2	sp|Q9UL54-2|TAOK2_HUMAN	Isoform 2 of Serine/threonine-protein kinase TAO2 OS=Homo sapiens GN=TAOK2	49	11	0.824209	0.748678	1.03461	1.1263	1.15245	0.00979047	0.489919
1347	1057.3	TAOK3	sp|Q9H2K8|TAOK3_HUMAN	Serine/threonine-protein kinase TAO3 OS=Homo sapiens GN=TAOK3 PE=1 SV=2	24	11	0.682678	0.715404	1.0977	1.22869	1.17399	0.00266814	0.739101
3050	2611.1	KCC4	sp|Q16566|KCC4_HUMAN	Calcium/calmodulin-dependent protein kinase type IV OS=Homo sapiens GN=CAMK4 PE=1 SV=1	29	7	0.799233	0.715404	1.00938	1.04439	1.0986	0.00770684	0.4725
981	740.1	MARK3	sp|P27448-3|MARK3_HUMAN	Isoform 3 of MAP/microtubule affinity-regulating kinase 3 OS=Homo sapiens GN=MARK3	91	16	0.782583	0.732041	0.984142	1.08535	1.10937	0.0106852	0.484586
4514	4020.1	MARK4	sp|Q96L34|MARK4_HUMAN	MAP/microtubule affinity-regulating kinase 4 OS=Homo sapiens GN=MARK4 PE=1 SV=1	15	8	0.774257	0.715404	1.2491	1.1263	1.10937	0.00639372	0.641119
3791	3313.1	MAPK2	sp|P49137|MAPK2_HUMAN	MAP kinase-activated protein kinase 2 OS=Homo sapiens GN=MAPKAPK2 PE=1 SV=1	21	6	1.20718	1.34762	0.782267	1.02391	0.883188	0.035618	-0.510905
3792	3313.2	MAPK3	sp|Q16644|MAPK3_HUMAN	MAP kinase-activated protein kinase 3 OS=Homo sapiens GN=MAPKAPK3 PE=1 SV=1	20	6	1.24048	1.43081	0.76965	0.993193	0.840105	0.0242963	-0.622349
5997	5473.1	MAPK5	sp|Q8IW41-2|MAPK5_HUMAN	Isoform 2 of MAP kinase-activated protein kinase 5 OS=Homo sapiens GN=MAPKAPK5	8	3	0.807559	0.781953	1.12293	1.10582	1.03398	0.00402857	0.452534
5124	4616.1	PRPK	sp|Q96S44|PRPK_HUMAN	TP53-regulating kinase OS=Homo sapiens GN=TP53RK PE=1 SV=2	12	3	1.2155	1.38921	1.13555	0.952237	1.15245	0.124722	-0.269988
5063	4556.1	CHK1	sp|O14757|CHK1_HUMAN	Serine/threonine-protein kinase Chk1 OS=Homo sapiens GN=CHEK1 PE=1 SV=2	12	5	0.699329	0.623899	0.820118	0.941998	0.915499	0.0251726	0.431925
6746	6225.1	NUAK1	sp|O60285|NUAK1_HUMAN	NUAK family SNF1-like kinase 1 OS=Homo sapiens GN=NUAK1 PE=1 SV=1	5	3	0.782583	0.806909	0.94629	0.962476	0.92627	0.00268871	0.249839
1779	1437.1	B0LPE5	tr|B0LPE5|B0LPE5_HUMAN	V-akt murine thymoma viral oncogene homolog 1 OS=Homo sapiens GN=AKT1 PE=4 SV=1	54	12	0.807559	0.865139	0.94629	1.22869	1.12014	0.0942641	0.393193
1507	1204.1	KPCA	sp|P17252|KPCA_HUMAN	Protein kinase C alpha type OS=Homo sapiens GN=PRKCA PE=1 SV=4	63	10	0.566124	0.499119	1.04723	1.35156	1.14168	0.0121187	1.1478
718	512.1	SMG1	sp|Q96Q15|SMG1_HUMAN	Serine/threonine-protein kinase SMG1 OS=Homo sapiens GN=SMG1 PE=1 SV=3	121	48	0.691004	0.690448	0.971525	1.1263	1.06629	0.00823513	0.610654
3352	2895.1	ATM	sp|Q13315|ATM_HUMAN	Serine-protein kinase ATM OS=Homo sapiens GN=ATM PE=1 SV=3	25	10	1.22383	1.40585	0.693946	0.993193	0.753941	0.0347131	-0.692329
7632	7122.1	AURKB	sp|Q96GD4|AURKB_HUMAN	Serine/threonine-protein kinase 12 OS=Homo sapiens GN=AURKB PE=1 SV=3	3	2	0.441243	0.598943	0.845353	1.20821	1.08783	0.0389463	1.0096
699	497.2	KCC2B	sp|Q13554-6|KCC2B_HUMAN	Isoform 6 of Calcium/calmodulin-dependent protein kinase type II subunit beta OS=Homo sapiens GN=CAMK2B	89	11	0.657702	0.582305	1.08508	1.08535	1.10937	0.000551545	0.818294
6313	5793.1	KKCC1	sp|Q8N5S9-2|KKCC1_HUMAN	Isoform 2 of Calcium/calmodulin-dependent protein kinase kinase 1 OS=Homo sapiens GN=CAMKK1	7	2	0.832535	0.890095	1.28696	1.19798	1.16322	0.00650742	0.497591
5111	4603.1	KKCC2	sp|Q96RR4|KKCC2_HUMAN	Calcium/calmodulin-dependent protein kinase kinase 2 OS=Homo sapiens GN=CAMKK2 PE=1 SV=2	12	4	0.532822	0.532393	0.958908	1.24917	1.21708	0.0143024	1.10006
2487	2093.1	CDK1	sp|P06493|CDK1_HUMAN	Cyclin-dependent kinase 1 OS=Homo sapiens GN=CDK1 PE=1 SV=3	38	7	0.657702	0.765316	1.11031	1.07511	1.12014	0.00298329	0.630978
2222	1840.1	B2R6Q4	tr|B2R6Q4|B2R6Q4_HUMAN	C-src tyrosine kinase, isoform CRA_a OS=Homo sapiens GN=CSK PE=2 SV=1	43	8	0.749281	0.657173	0.933673	1.11606	1.03398	0.0237507	0.547642
2333	1944.1	MK08	sp|P45983-2|MK08_HUMAN	Isoform 1 of Mitogen-activated protein kinase 8 OS=Homo sapiens GN=MAPK8	41	8	0.724305	0.732041	1.0977	1.18774	1.29247	0.00776995	0.711798
8040	7534.1	PRR5	sp|P85299|PRR5_HUMAN	Proline-rich protein 5 OS=Homo sapiens GN=PRR5 PE=1 SV=1	2	2	1.7067	1.3809	0.921056	0.68602	0.980123	0.0269638	-0.840054
5538	5016.1	MK14	sp|Q16539-3|MK14_HUMAN	Isoform Mxi2 of Mitogen-activated protein kinase 14 OS=Homo sapiens GN=MAPK14	10	3	1.3154	1.35594	0.820118	0.880563	0.872417	0.000473178	-0.639022
292	186.2	PAK1	sp|Q13153|PAK1_HUMAN	Serine/threonine-protein kinase PAK 1 OS=Homo sapiens GN=PAK1 PE=1 SV=2	166	11	0.71598	0.623899	1.23649	1.16726	1.18476	0.00122066	0.83632
291	186.1	PAK2	sp|Q13177|PAK2_HUMAN	Serine/threonine-protein kinase PAK 2 OS=Homo sapiens GN=PAK2 PE=1 SV=3	226	13	0.71598	0.690448	1.11031	1.25941	1.18476	0.0033696	0.752644
706	500.1	KAPCA	sp|P17612|KAPCA_HUMAN	cAMP-dependent protein kinase catalytic subunit alpha OS=Homo sapiens GN=PRKACA PE=1 SV=2	124	12	0.790908	0.790272	1.2491	1.19798	1.2817	0.000728987	0.652739
3664	3192.1	RIPK1	sp|Q13546|RIPK1_HUMAN	Receptor-interacting serine/threonine-protein kinase 1 OS=Homo sapiens GN=RIPK1 PE=1 SV=3	22	9	1.69005	1.83842	0.693946	0.747455	0.721629	0.000390089	-1.29095
850	629.1	KS6A3	sp|P51812|KS6A3_HUMAN	Ribosomal protein S6 kinase alpha-3 OS=Homo sapiens GN=RPS6KA3 PE=1 SV=1	104	18	1.27378	1.34762	1.08508	1.06487	0.947811	0.0204107	-0.344075
1879	1529.2	FYN	sp|P06241|FYN_HUMAN	Tyrosine-protein kinase Fyn OS=Homo sapiens GN=FYN PE=1 SV=3	48	10	0.732631	0.682129	0.971525	1.06487	0.947811	0.0103573	0.491826
7562	7052.1	M3K5	sp|Q99683|M3K5_HUMAN	Mitogen-activated protein kinase kinase kinase 5 OS=Homo sapiens GN=MAP3K5 PE=1 SV=1	3	2	1.8066	1.38921	0.782267	0.696259	0.840105	0.0152992	-1.04787
2787	2365.1	MP2K6	sp|P52564|MP2K6_HUMAN	Dual specificity mitogen-activated protein kinase kinase 6 OS=Homo sapiens GN=MAP2K6 PE=1 SV=1	33	5	0.71598	0.890095	1.07246	1.24917	1.20631	0.0290138	0.550323
